# Supplementary material
Source: PubMed Central journal article supplement (PMC2836101)

## **SUPPLEMENTAL MATERIAL**

### **SUPPLEMENTARY EXPERIMENTAL PROCEDURES**

*TUNEL staining*- TUNEL staining was performed as described previously (4,18-20).

*Cell cycle assay*- Determination of cell cycle stage of cells from *Tgfb $\beta$ 2<sup>fl/fl</sup>* and *Tgfb $\beta$ 2<sup>fl/fl</sup>;Wnt1-Cre* maxilla was performed at different embryonic stages by staining the cells with 5  $\mu$ g/ml propidium iodide (Sigma). Cells were analyzed by flow cytometry according to standard procedures (Beckman).

### **LEGENDS TO SUPPLEMENTARY FIGURES**

**Fig. S1.** Cell death in *Tgfb $\beta$ 2<sup>fl/fl</sup>* and *Tgfb $\beta$ 2<sup>fl/fl</sup>;Wnt1-Cre* mice during maxillary development. *A-D*. BrdU staining of *Tgfb $\beta$ 2<sup>fl/fl</sup>* (*A, C*) and *Tgfb $\beta$ 2<sup>fl/fl</sup>;Wnt1-Cre* (*B, D*) maxilla at E13.5 and E14.5. Asterisk indicates the reduced BrdU-positive area in the maxilla of *Tgfb $\beta$ 2<sup>fl/fl</sup>;Wnt1-Cre* mice. Tg is tongue. Scale bar; 200  $\mu$ m. *E*. Cell cycle analysis by flow cytometry. The percentage of *Tgfb $\beta$ 2<sup>fl/fl</sup>* (white bars) and *Tgfb $\beta$ 2<sup>fl/fl</sup>;Wnt1-Cre* (black bars) maxillary cells in G1/G0, S, G2/M phases of the cell cycle at E12.5, E13.5 and E14.5. *F-K*. TUNEL staining of the maxilla at E12.5, E13.5 and E14.5 in sections from *Tgfb $\beta$ 2<sup>fl/fl</sup>* (*F, H, J*) and *Tgfb $\beta$ 2<sup>fl/fl</sup>;Wnt1-Cre* (*G, I, K*) mice. Line outlines the edges of palates and tongue.

**Fig. S2.** Time course of expression of genes related to cell proliferation and osteogenic differentiation in *Tgfb $\beta$ 2<sup>fl/fl</sup>;Wnt1-Cre* maxilla during intramembranous ossification. Quantitative RT-PCR analyses of indicated mRNA from the maxilla of *Tgfb $\beta$ 2<sup>fl/fl</sup>* (open columns) and *Tgfb $\beta$ 2<sup>fl/fl</sup>;Wnt1-Cre* (closed columns) mice at E11.5, E12.5 and E13.5. \*,  $P < 0.05$ .

**Fig. S3.** Gene expression of *Taf4b* during osteogenic differentiation in *Tgfb $\beta$ 2<sup>fl/fl</sup>;Wnt1-Cre* MEMM cells. mRNA expression of *Taf4b* after no osteogenic induction (-) or induction (+) in *Tgfb $\beta$ 2<sup>fl/fl</sup>* and *Tgfb $\beta$ 2<sup>fl/fl</sup>;Wnt1-Cre* MEMM cells.

**Fig. S4.** Model for Tgf- $\beta$ -mediated effect on proliferation/differentiation and gene regulation during intramembranous ossification. *A*. Schematic diagram depicting our model of the proliferation and differentiation of wild type (*Wt*) and *Tgfb $\beta$ 2<sup>fl/fl</sup>;Wnt1-Cre* CNCC. The proliferation period of osteoprogenitor cells derived from *Tgfb $\beta$ 2<sup>fl/fl</sup>;Wnt1-Cre* mice is shorter than that of wild-type mice. The consequence of the decreased proliferation term is the early onset of osteogenic differentiation. The decreased size of the maxilla in *Tgfb $\beta$ 2<sup>fl/fl</sup>;Wnt1-Cre* mice results from the decreased number of osteoprogenitor cells. *B*. Schematic diagram depicting our model of the network of Tgf- $\beta$  downstream targets. Tgf- $\beta$  regulates the gene expressions of basal transcriptional factors *Taf4b* and, to a lesser extent, *Taf1*. *Taf4b*, which is expressed specifically in osteoprogenitor cells, regulates the downstream targets *FoxO4*, *Runx2*, and *Spp1*. Gene expression of Cyclin D is negatively regulated by *FoxO4*. *Runx2* is regulated by a combination of *Taf1* and *Taf4b*, and it in turn regulates the expression of osteogenic genes such as *osteonectin* (*On*), *collagen type I* (*Coll*), and *osteocalcin* (*Ocn*).

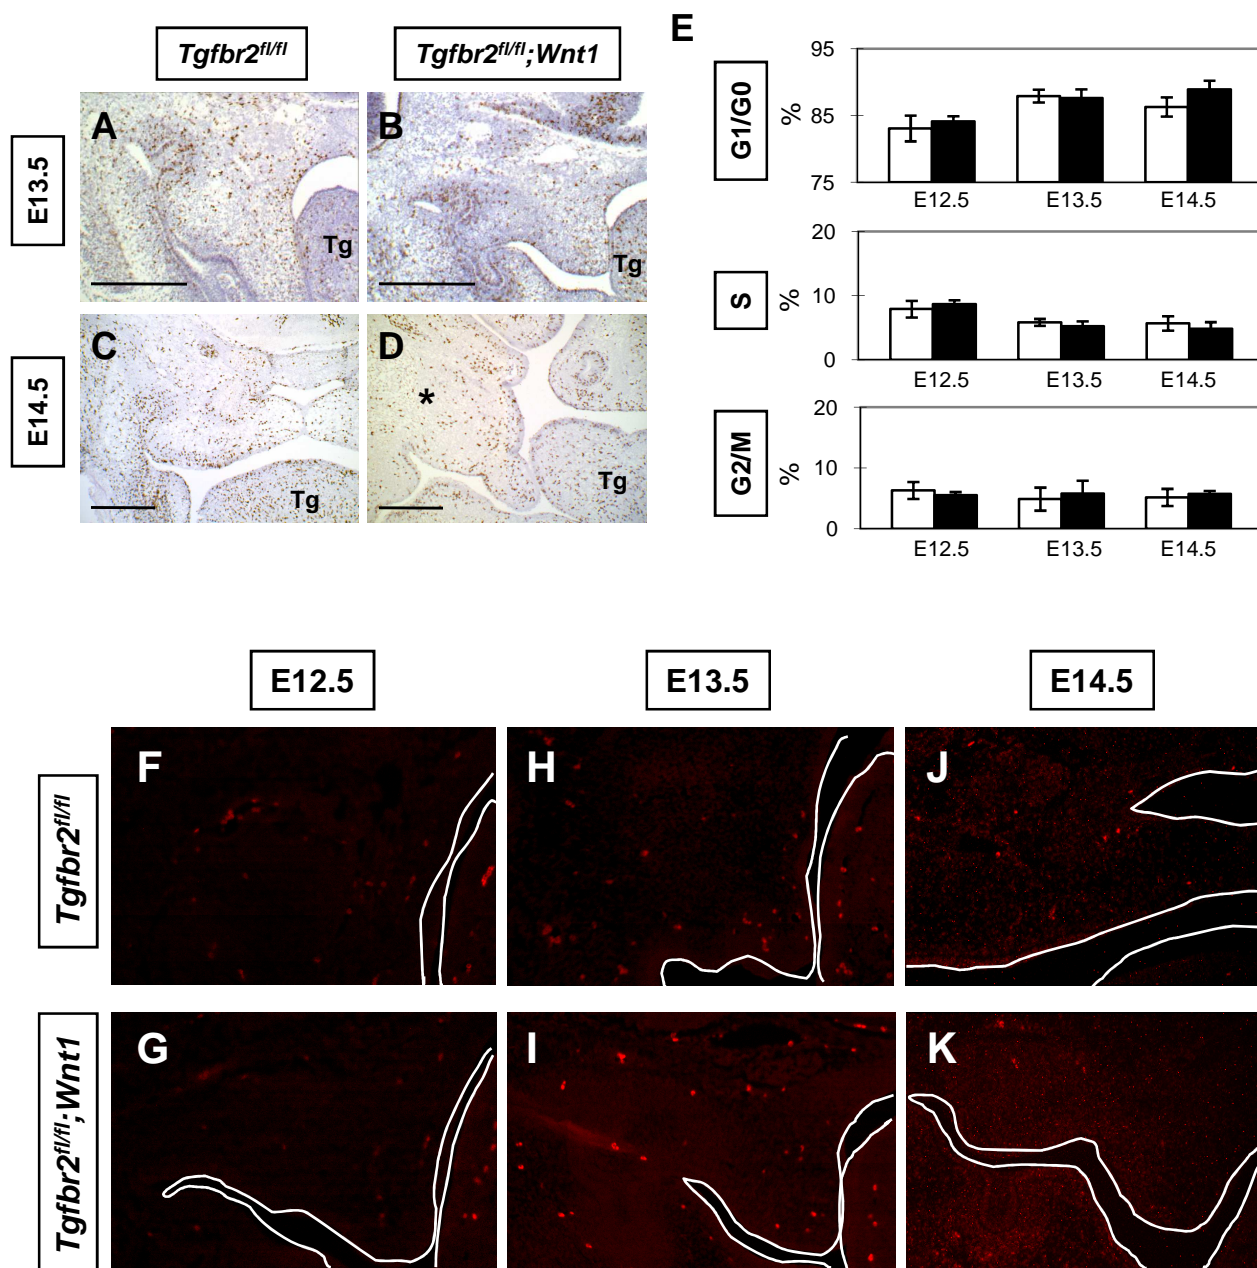

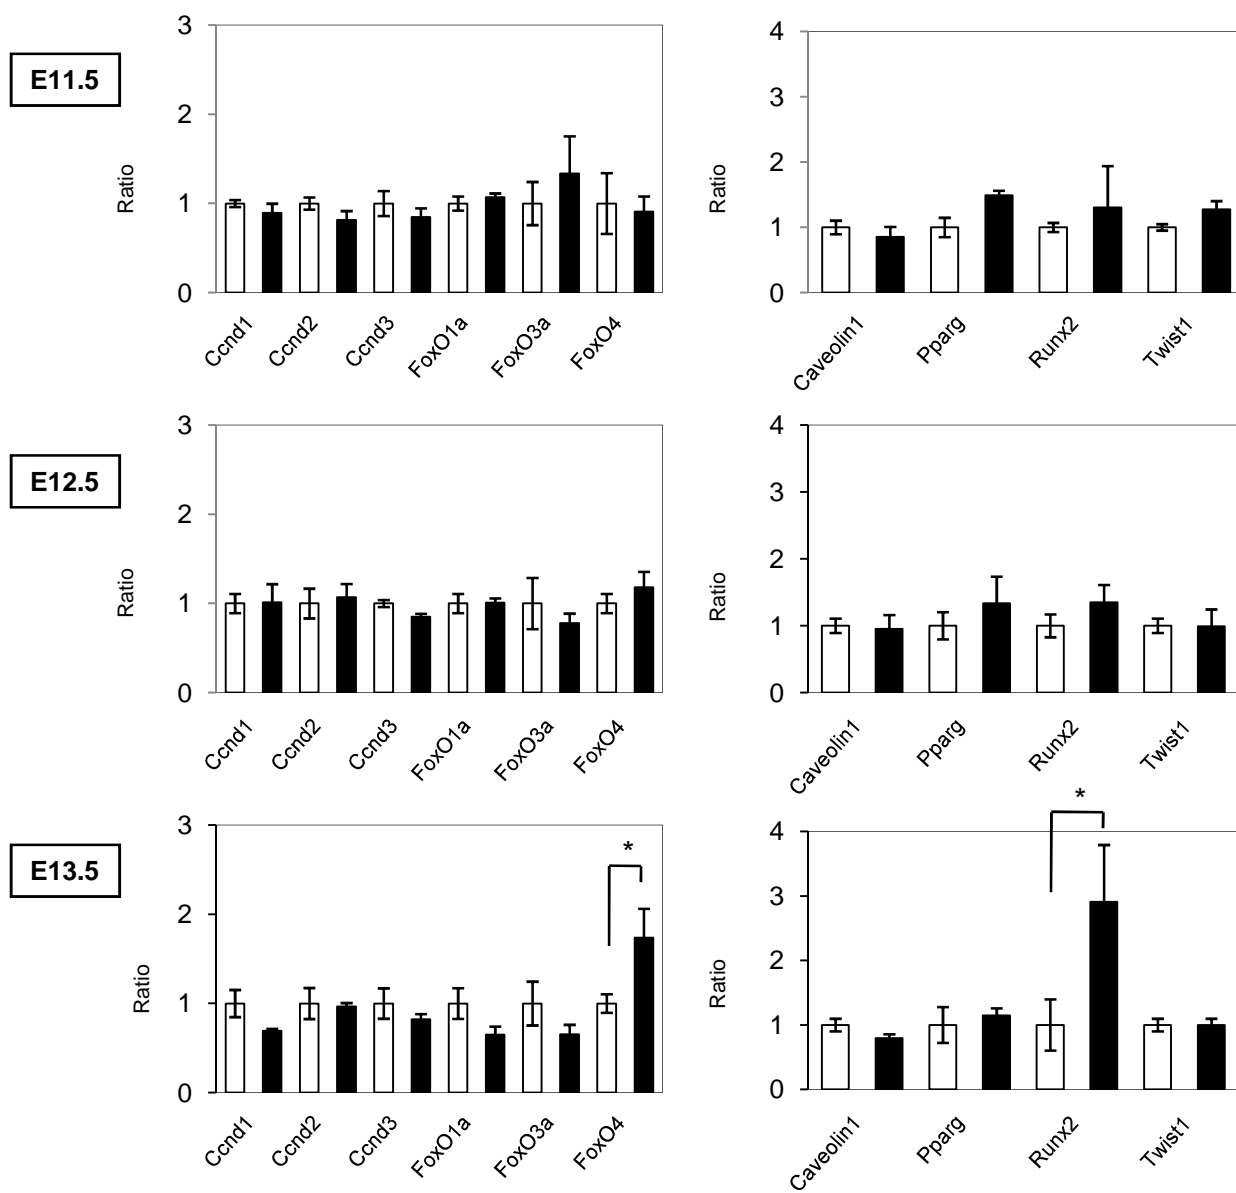

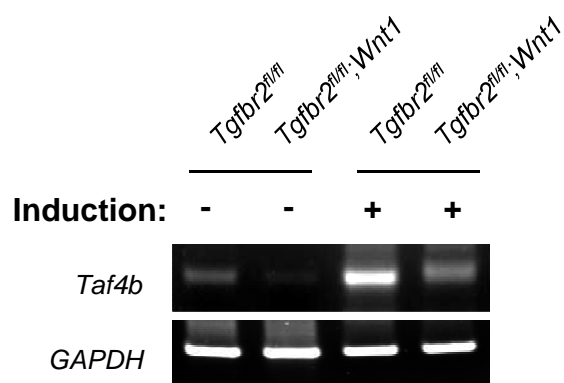

A

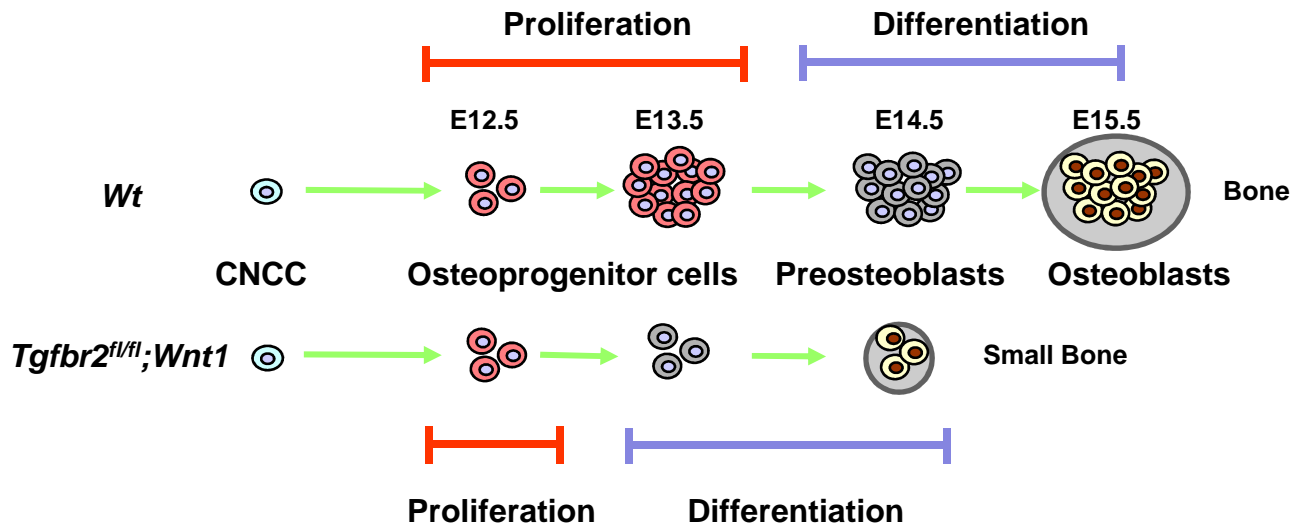

B

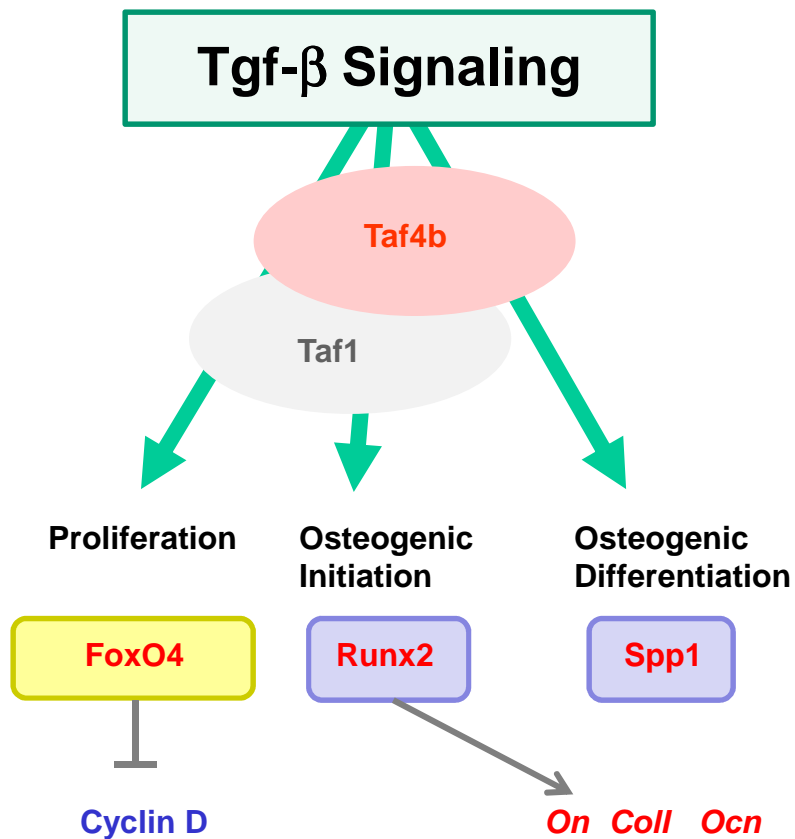

Supplement: supp_M109.035105_jbc.M109.035105-1.pdf [file supp_M109.035105_jbc.M109.035105-1.pdf]
